# Supplementary material
Source: PubMed Central journal article supplement (PMC1691609)
Supplement: 15101698s01.pdf [file 15101698s01.pdf]

## **Electronic appendix A**

This is an electronic appendix to the paper by Oro *et al.* 2004 Influence of food availability on demography and local population dynamics in a long-lived seabird. *Proc. R. Soc. Lond. B* **271**, 387–396. (DOI 10.1098/rspb.2003.2609.)

Electronic appendices are refereed with the text. However, no attempt is made to impose a uniform editorial style on the electronic appendices.

Table 4. Discard availability (in tons of fishes) estimated through statistics of fish catches from fishermen's guild bulletins, which in this area are highly correlated with the amount of fish discarded.

(The lack of catches indicates the periods of trawling moratorium. Data are separated by month and grouped for the egg-laying and incubation periods (variable denoted by  $\varepsilon_1$  and  $\varepsilon_3$  (as categorical) in the models) and chick-rearing period (variables denoted by  $\varepsilon_2$  in the models).)

| year | March | April | May   | June  | July  | stage affected                        | total egg-laying<br>and incubation<br>periods | total chick-<br>rearing period | total breeding<br>season |
|------|-------|-------|-------|-------|-------|---------------------------------------|-----------------------------------------------|--------------------------------|--------------------------|
| 1992 | 105.7 | 0     | 0     | 138.9 | 149.7 | laying and<br>incubation              | 105.7                                         | 288.6                          | 394.2                    |
| 1993 | 148.8 | 109.2 | 136.0 | 0     | 0     | chick rearing                         | 394.0                                         | 0                              | 394.0                    |
| 1994 | 141.2 | 124.6 | 0     | 0     | 135.7 | incubation and early<br>chick rearing | 265.8                                         | 135.7                          | 401.5                    |
| 1995 | 133.4 | 103.5 | 114.1 | 0     | 0     | chick rearing                         | 351.0                                         | 0                              | 351.0                    |
| 1996 | 104.1 | 124.2 | 121.7 | 0     | 0     | chick rearing                         | 349.9                                         | 0                              | 349.9                    |
| 1997 | 118.8 | 141.4 | 69.8  | 0     | 73.5  | early chick rearing                   | 330.0                                         | 73.5                           | 403.5                    |
| 1998 | 146.7 | 142.1 | 150.3 | 0     | 0     | chick rearing                         | 439.0                                         | 0                              | 439.1                    |
| 1999 | 130.4 | 93.5  | 130.4 | 0     | 0     | chick rearing                         | 354.4                                         | 0                              | 354.4                    |
| 2000 | 152.2 | 129.0 | 165.0 | 0     | 0     | chick rearing                         | 446.1                                         | 0                              | 446.2                    |

Table 5. Set of models starting from the initial model ( $T_t, \phi_t, p_t$ ) and also taking into account the age effect (both the two age classes effect ( $A$ ) and the true age effect ( $A$ ); see text for explanations) and resight effort effect on recapture probabilities. (For each model, we give the number of estimable parameters (np), its deviance (DEV) and the Akaike Information Criterion (AIC), which results from  $(DEV + 2 \times np)$ . Model notation is according to Lebreton *et al.* (1992). Bold type denotes the provisionally selected model.)

| model                            | np        | DEV            | AIC            |
|----------------------------------|-----------|----------------|----------------|
| $(T_t, \phi_t, p_t)$             | 22        | 559.002        | 603.002        |
| $(T_t, \phi_t, p)$               | 15        | 741.313        | 771.313        |
| $(T_t, \phi, p_t)$               | 17        | 559.022        | 591.022        |
| $(T, \phi, p_t)$                 | 10        | 608.807        | 628.807        |
| $(T_a, \phi, p_t)$               | 11        | 596.505        | 618.505        |
| $(T_A, \phi_A, p_t)$             | 12        | 843.529        | 867.529        |
| $(T_{t+A}, \phi_{t+A}, p_t)$     | 21        | 817.755        | 859.755        |
| $(T_{t+A}, \phi_{t+A}, p_{t+A})$ | 22        | 812.021        | 856.021        |
| $(T, \phi, p_e)$                 | 4         | 623.575        | 631.575        |
| $(T_a, \phi, p_e)$               | 5         | 610.038        | 620.038        |
| $(T_a, \phi, p_e)$               | 5         | 614.263        | 614.263        |
| $(T_t, \phi_A^2, p_t)$           | 17        | 841.145        | 875.145        |
| $(T_t, \phi_A, p_t)$             | 17        | 840.467        | 874.467        |
| $(T_a, \phi_A, p_t)$             | 17        | 842.606        | 876.606        |
| $(T_A, \phi, p_t)$               | 11        | 564.410        | 586.410        |
| $(T_{\bar{A}}, \phi, p_t)$       | <b>11</b> | <b>554.969</b> | <b>576.969</b> |
| $(T_{\bar{A}5}, \phi, p_t)$      | 11        | 559.313        | 581.313        |
| $(T_{\bar{A}6}, \phi, p_t)$      | 11        | 557.513        | 579.513        |
| $(T_{\bar{A}7}, \phi, p_t)$      | 11        | 557.989        | 579.989        |
| $(T_w, \phi, p_t)$               | 12        | 560.401        | 584.401        |

Table 6. Set of models starting from the provisionally selected model ( $T_{\bar{A}}, \phi, p_t$ ) and taking into account the effect of food availability (as amounts of trawler discards ( $\varepsilon$ )) on the three parameters: transient, survival and recapture. (For each model, the number of identifiable parameters (np), its deviance (DEV) and the Akaike Information Criterion (AIC) are shown. Bold type denotes the finally selected model.)

| model                                                        | np | DEV            | AIC            |
|--------------------------------------------------------------|----|----------------|----------------|
| $(T_{\bar{A}}, \phi, p_t)$                                   | 11 | 554.969        | 576.969        |
| $(T_{\bar{A}+\varepsilon}, \phi, p_t)$                       | 12 | 553.805        | 577.667        |
| $(T_{\bar{A}+\varepsilon1}, \phi, p_t)$                      | 12 | 556.265        | 580.265        |
| $(T_{\bar{A}+\varepsilon2}, \phi, p_t)$                      | 12 | 552.288        | 576.288        |
| $(T_{\bar{A}+\varepsilon3}, \phi, p_t)$                      | 12 | <b>547.160</b> | <b>571.160</b> |
| $(T_{\bar{A}+\varepsilon3}, \phi, p_{\bar{A}+\varepsilon3})$ | 7  | 562.421        | 576.421        |
| $(T_{\bar{A}+\varepsilon3}, \phi, p_{\bar{A}+\varepsilon2})$ | 7  | 569.007        | 583.007        |
| $(T_{\bar{A}+\varepsilon3}, \phi, p_{\bar{A}+\varepsilon1})$ | 7  | 574.199        | 588.199        |
| $(T_{\bar{A}+\varepsilon3}, \phi, p_{\varepsilon3})$         | 6  | 574.658        | 586.658        |
| $(T_{\bar{A}+\varepsilon3}, \phi_e, p_t)$                    | 13 | 551.678        | 577.678        |
| $(T_{\bar{A}+\varepsilon3}, \phi_{\varepsilon1}, p_t)$       | 13 | 552.712        | 578.712        |
| $(T_{\bar{A}+\varepsilon3}, \phi_{\varepsilon2}, p_t)$       | 13 | 552.170        | 578.170        |
| $(T_{\bar{A}+\varepsilon3}, \phi_{\varepsilon3}, p_t)$       | 13 | 551.337        | 577.337        |
| $(T_{\varepsilon3}, \phi, p_t)$                              | 11 | 555.009        | 577.009        |
